# Supplementary material for: A practical risk stratification system based on ultrasonography and clinical characteristics for predicting the malignancy of soft tissue masses
Source: PubMed Central journal article supplement (PMC11424597; doi:10.1186/s13244-024-01802-9), 2024-09-19
Supplement: 13244_2024_1802_MOESM1_ESM.pdf [file 13244_2024_1802_MOESM1_ESM.pdf]

**A Practical Risk Stratification System Based on Ultrasonography and Clinical Characteristics for  
Predicting the Malignancy of Soft Tissue Masses  
ELECTRONIC SUPPLEMENTARY MATERIAL**

**Supplementary Table 1. The inter-observer variability of US features in the training and validation sets.**

| Features      | Training Set |                  |          | Validation Set |                  |          |
|---------------|--------------|------------------|----------|----------------|------------------|----------|
|               | Kappa        | 95% CI           | Mass (n) | Kappa          | 95% CI           | Mass (n) |
| <b>Layer</b>  | 0.851        | 0.562 -<br>1.000 | 50       | 0.959          | 0.865 -<br>1.000 | 50       |
| <b>Shape</b>  | 0.960        | 0.872 -<br>1.000 | 50       | 0.891          | 0.703 -<br>1.000 | 50       |
| <b>Margin</b> | 0.840        | 0.676 -<br>0.960 | 50       | 0.769          | 0.516 -<br>0.947 | 50       |

|                      |       |         |    |       |              |    |
|----------------------|-------|---------|----|-------|--------------|----|
| <b>Echogenicity</b>  | 0.815 | 0.568 - | 50 | 0.912 | 0.764 -      | 50 |
|                      |       | 1.000   |    |       | 1.000        |    |
| <b>Composition</b>   | 0.855 | 0.575 - | 50 | 0.817 | 0.387 -      | 50 |
|                      |       | 1.000   |    |       | 1.000        |    |
| <b>Calcification</b> | 0.855 | 0.588 - | 50 | 0.912 | 0.631 -1.000 | 50 |
|                      |       | 1.000   |    |       |              |    |
| <b>Bone Invasion</b> | 0.864 | 0.659 - | 50 | 0.852 | 0.566 -      | 50 |
|                      |       | 1.000   |    |       | 1.000        |    |
| <b>Vascularity</b>   | 0.945 | 0.860 - | 50 | 0.916 | 0.806 -      | 50 |
|                      |       | 1.000   |    |       | 1.000        |    |

---

Note: CI, confidence interval; n, number; US, ultrasonography

**Supplementary Figure 1. A STM classified as RSS category 3. (a)** The mass is predominantly hyperechoic with a regular shape,

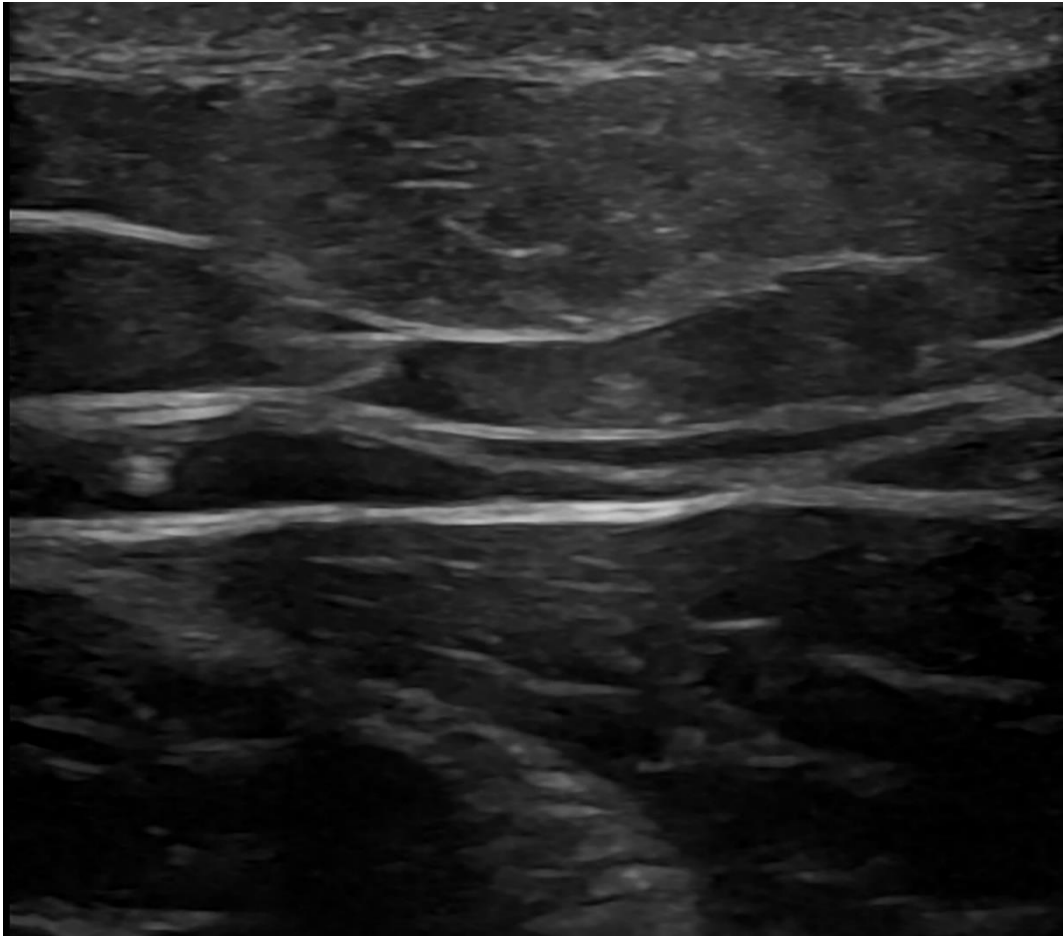

**a.**

a mean maximum diameter of 1.4 cm, a well-defined margin, and no bone invasion. **(b)** The mass is avascular. The patient is a 43-year-old male with a duration of over 12 months and no history of malignancy. The total score is 2. Postoperative pathology identifies it as a lipoma.

**Note:** RSS, risk stratification system; STM, soft tissue mass

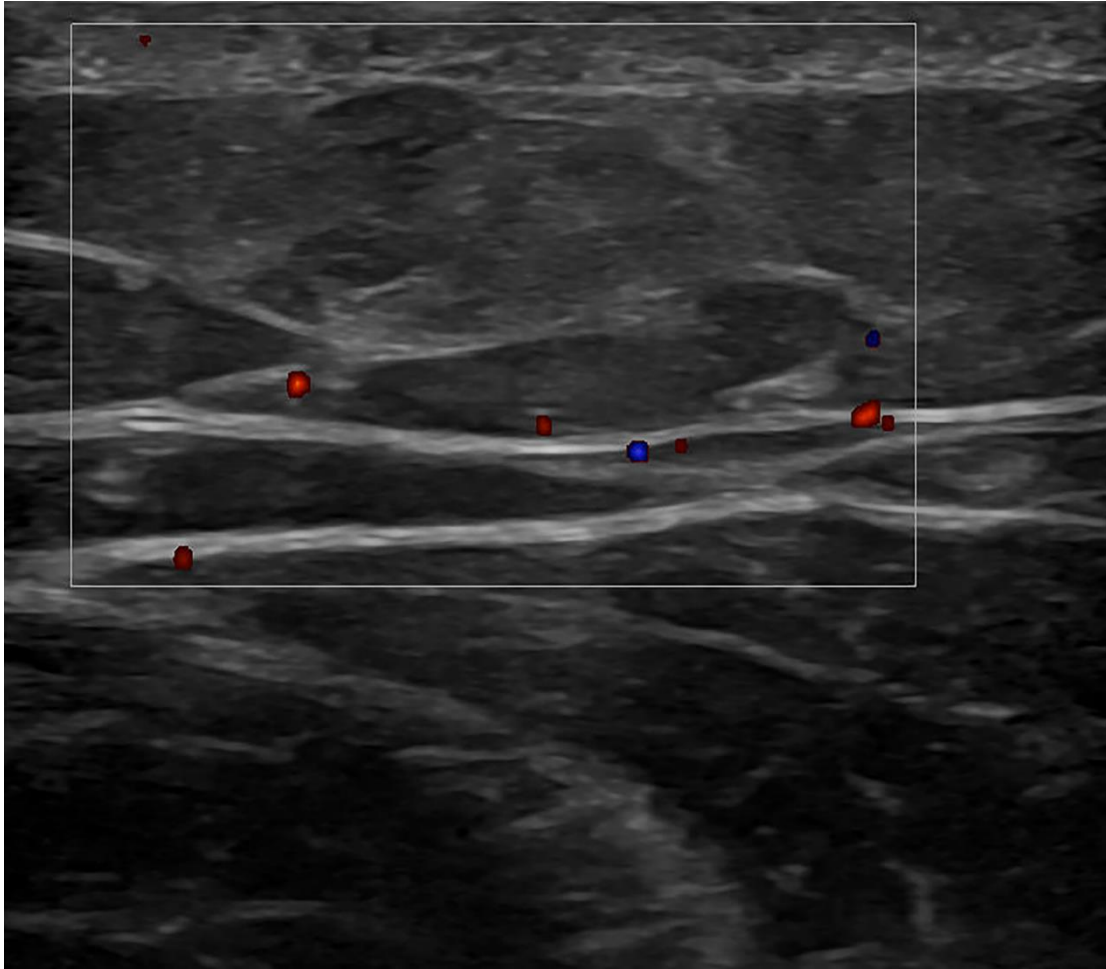

**b.**

Insights Imaging (2024) Zhang YL, Wu MJ, Hu Y, et al.

**Supplementary Figure 2. A STM classified as RSS category 4A. (a)** The mass is predominantly hypoechoic with an irregular shape, a mean maximum

diameter of 4.2 cm, a well-defined margin, and no bone

invasion. **(b)** The mass has a grade I vascularity. The patient

is a 38-year-old female with a duration of over 12 months and

no history of malignancy. The total score is 5. Postoperative

pathology identifies it as a schwannoma.

**Note:** RSS, risk stratification system; STM, soft tissue mass

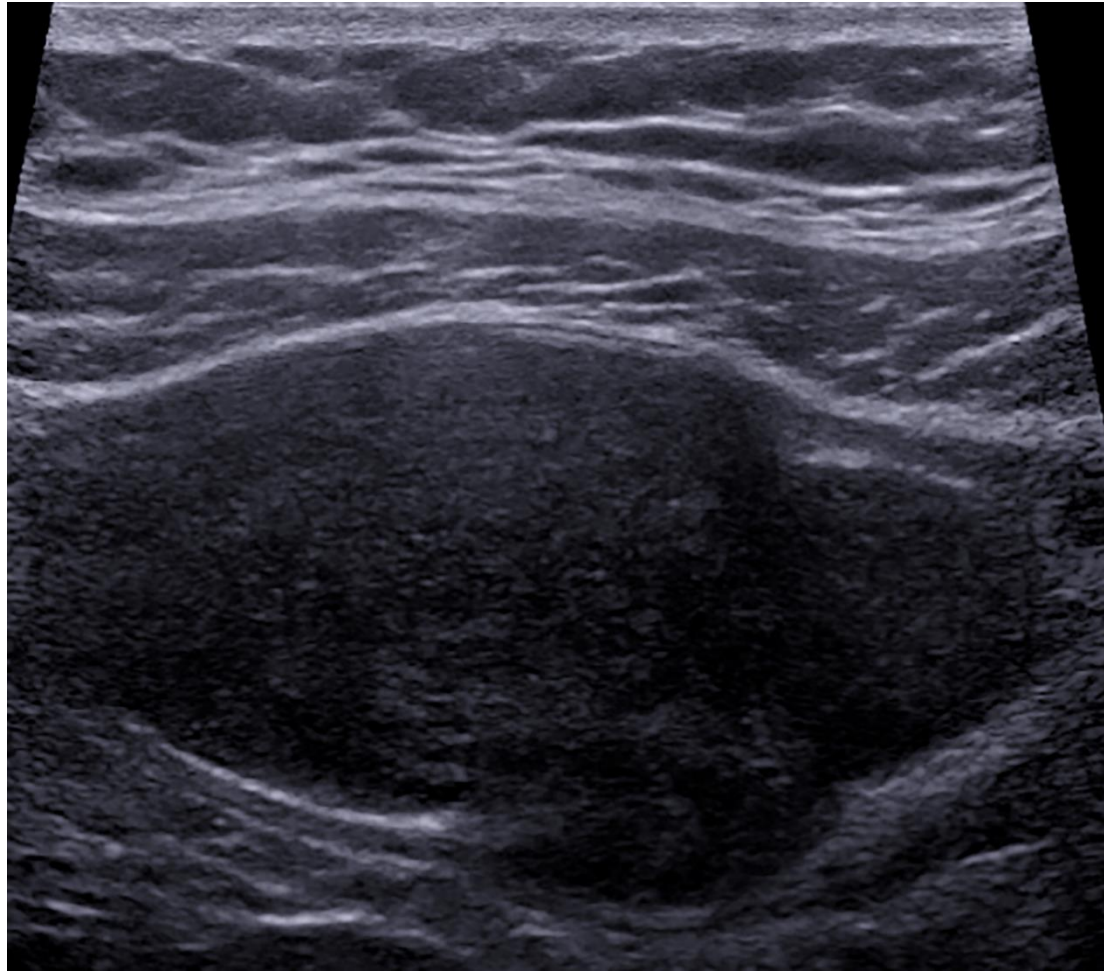

**a.**

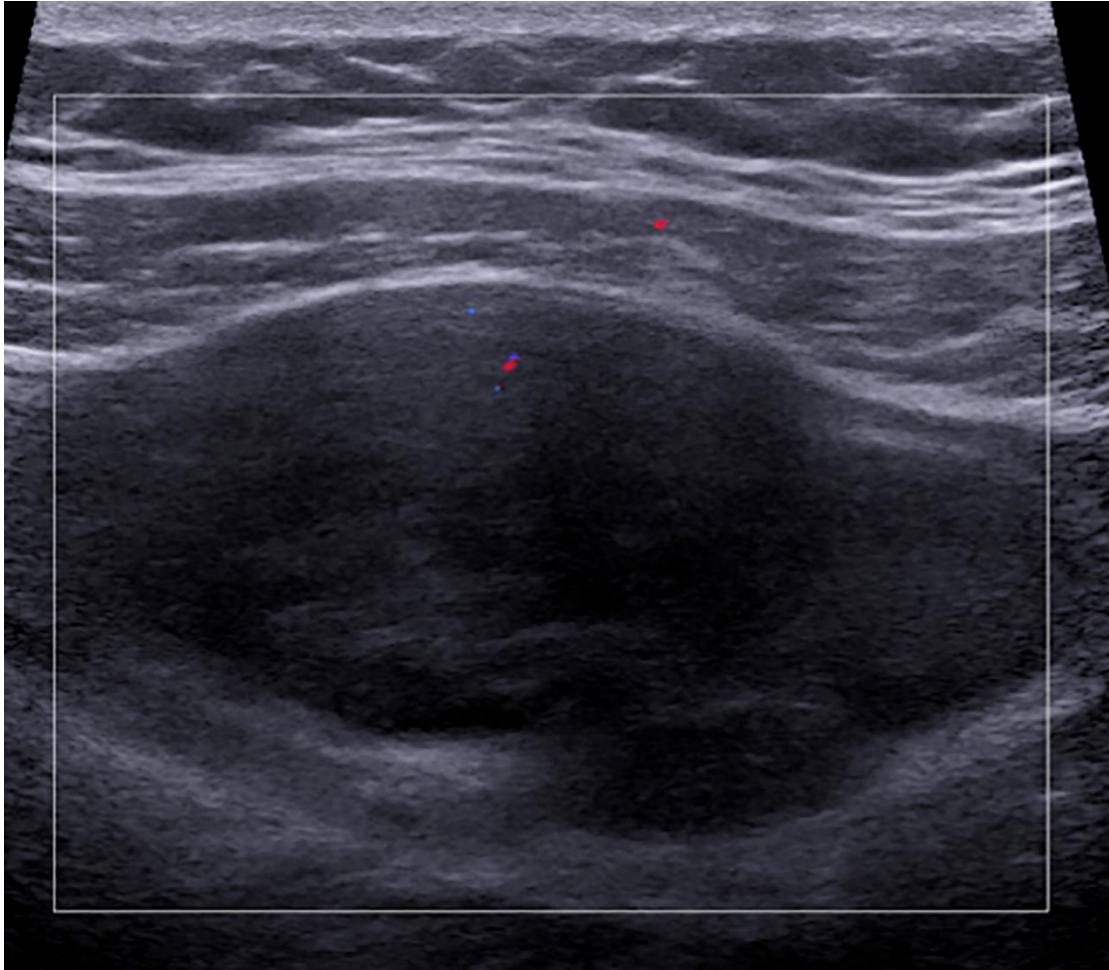

**b.**

**Supplementary Figure 3. A STM classified as RSS category 4B. (a)** The mass is predominantly hypoechoic with a regular shape, a mean maximum diameter of 5.4 cm, a well-defined margin, and no bone invasion. **(b)** The mass has a grade III vascularity. The patient is a 43-year-old female with a duration of 20 days and no history of malignancy. The total score is 8. Postoperative pathology identifies it as a smooth muscle sarcoma.

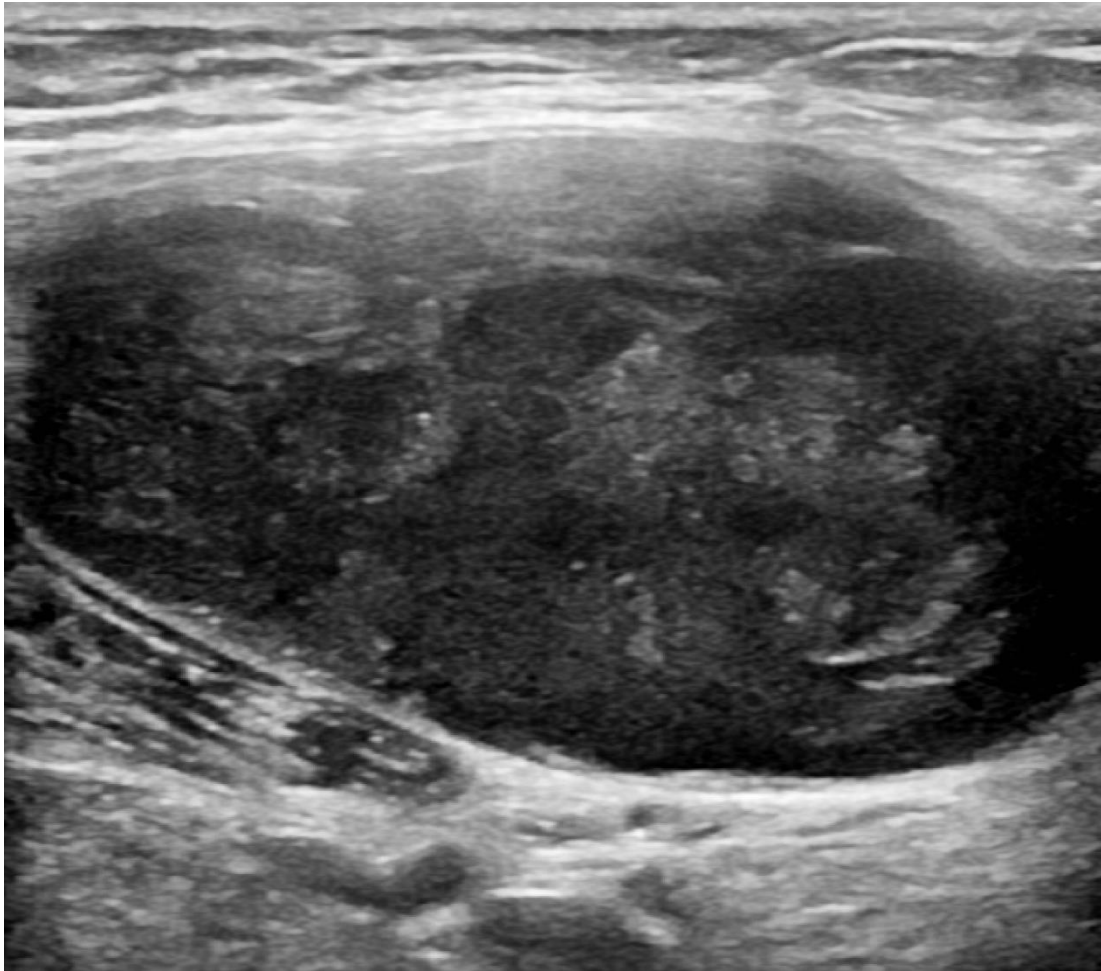

**a.**

duration of 20 days and no history of malignancy. The total score is 8. Postoperative pathology identifies it as a smooth muscle sarcoma.

**Note:** RSS, risk stratification system; STM, soft tissue mass

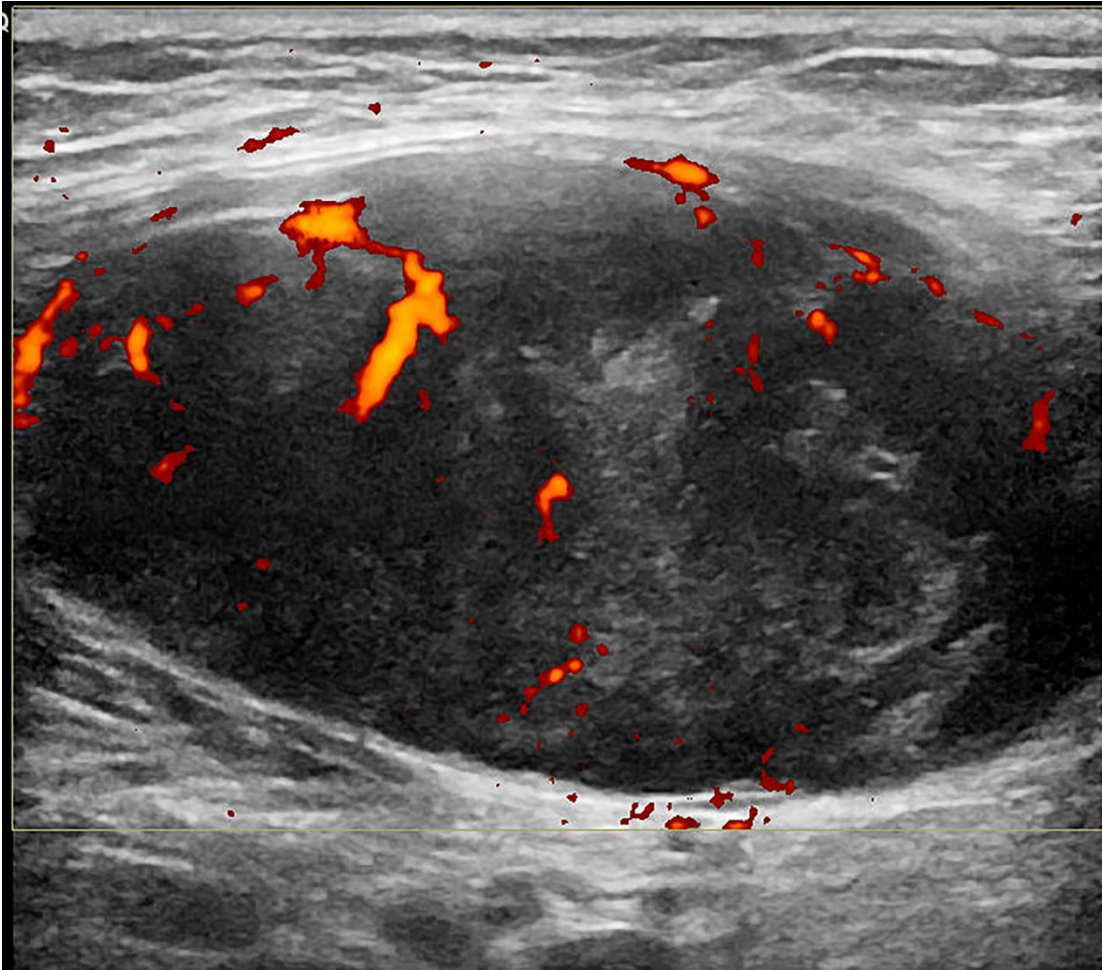

b.



**Supplementary Figure 4. A STM classified as RSS category 5. (a)** The mass is predominantly hypoechoic with a regular shape, a mean maximum diameter of 1.1 cm, an ill-defined margin, and no bone invasion. **(b)** The mass has a grade III vascularity. The patient is a 61-year-old female with a duration of 10 days and a history of malignancy. The total score is 12. Postoperative pathology identifies it as a metastatic carcinoma.

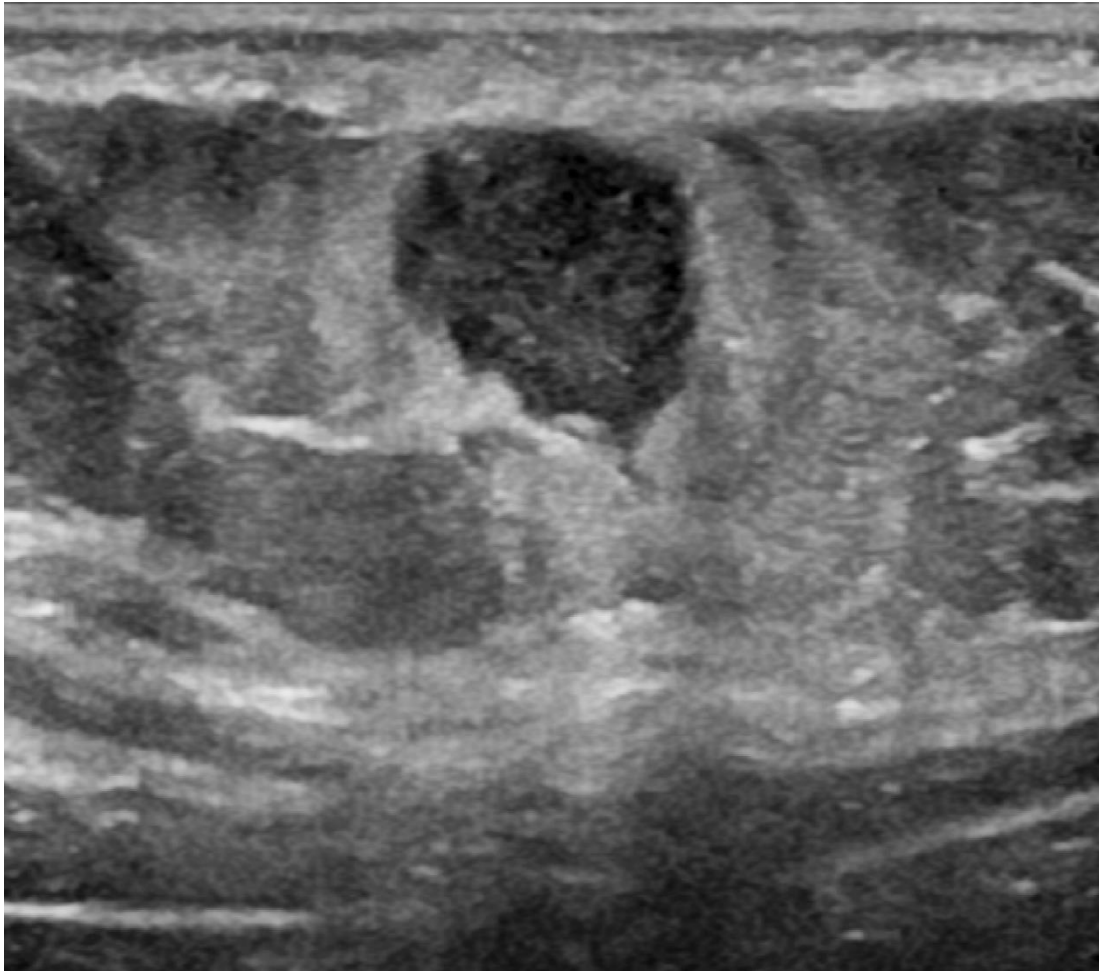

duration of 10 days and a history of malignancy. The total score is 12. Postoperative pathology identifies it as a metastatic carcinoma.

**Note:** RSS, risk stratification system; STM, soft tissue mass

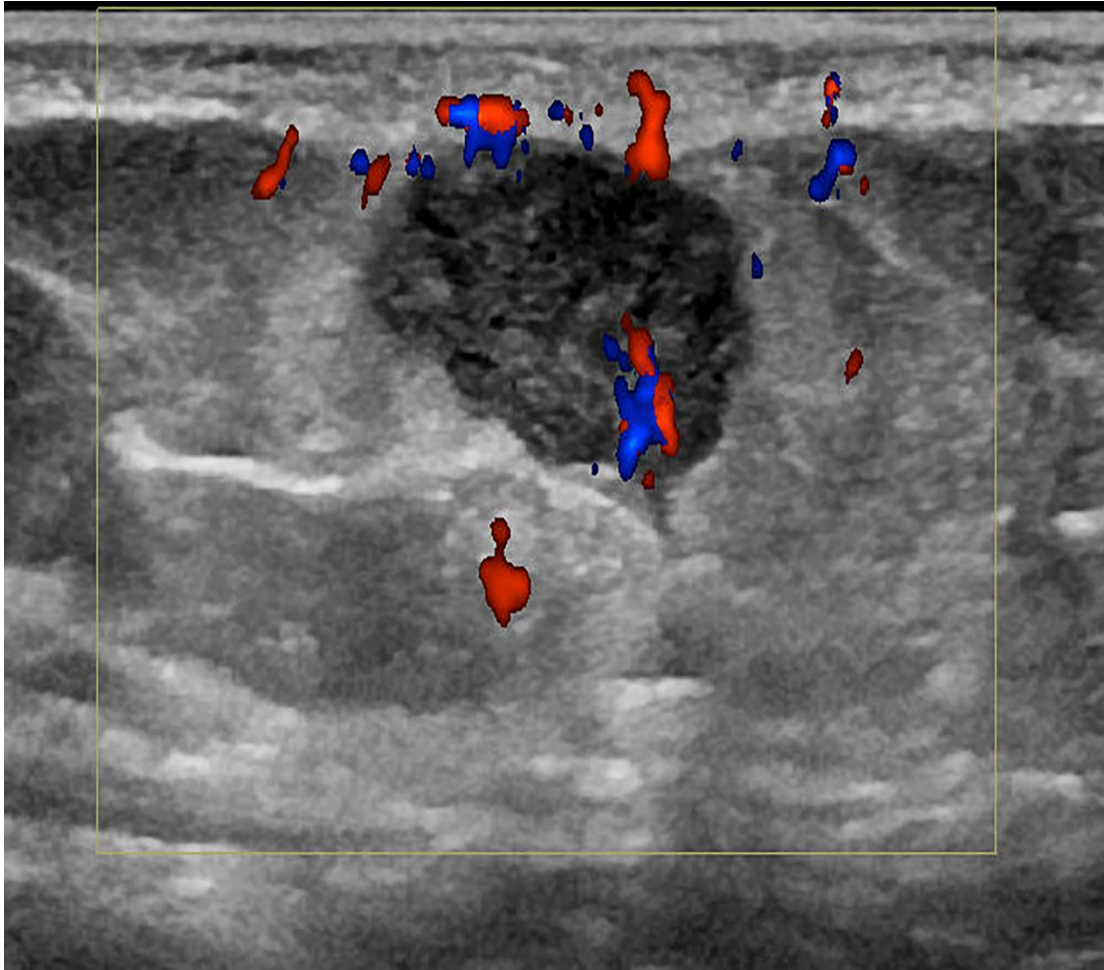

**b.**
